# Supplementary material for: Progress toward a biomimetic synthesis of pegaharmaline A
Source: Royal Society of Chemistry journal article supplement (doi:10.1039/d1ob02372a), 2022-01-01
Supplement: d1ob02372a1.pdf [file d1ob02372a1.pdf]

## **Progress toward a biomimetic synthesis of pegaharmaline**

**A**

Jessica Liyu, Shi Wei Kim, Tilo Söhnlel and Jonathan Sperry\*

[j.sperry@auckland.ac.nz](mailto:j.sperry@auckland.ac.nz)

**SUPPORTING INFORMATION**

## Contents

|                                               |     |
|-----------------------------------------------|-----|
| <sup>1</sup> H NMR spectrum of <b>1</b>       | S1  |
| <sup>13</sup> C NMR spectrum of <b>1</b>      | S2  |
| <sup>1</sup> H NMR spectrum of (±)- <b>7</b>  | S3  |
| <sup>13</sup> C NMR spectrum of (±)- <b>7</b> | S4  |
| <sup>1</sup> H NMR spectrum of (±)- <b>8</b>  | S5  |
| <sup>13</sup> C NMR spectrum of (±)- <b>8</b> | S6  |
| <sup>1</sup> H NMR spectrum of <b>10</b>      | S7  |
| <sup>13</sup> C NMR spectrum of <b>10</b>     | S8  |
| <sup>1</sup> H NMR spectrum of <b>13A</b>     | S9  |
| <sup>13</sup> C NMR spectrum of <b>13A</b>    | S10 |
| <sup>1</sup> H NMR spectrum of <b>13B</b>     | S11 |
| <sup>13</sup> C NMR spectrum of <b>13B</b>    | S12 |
| <sup>1</sup> H NMR spectrum of <b>23</b>      | S13 |
| <sup>13</sup> C NMR spectrum of <b>23</b>     | S14 |
| XRD data table                                | S15 |

2,3-Dimethylpyrrolo[2,1-b]quinazoline-1,9-dione (1) <sup>1</sup>H NMR (400 MHz, DMSO-*d*<sub>6</sub>)

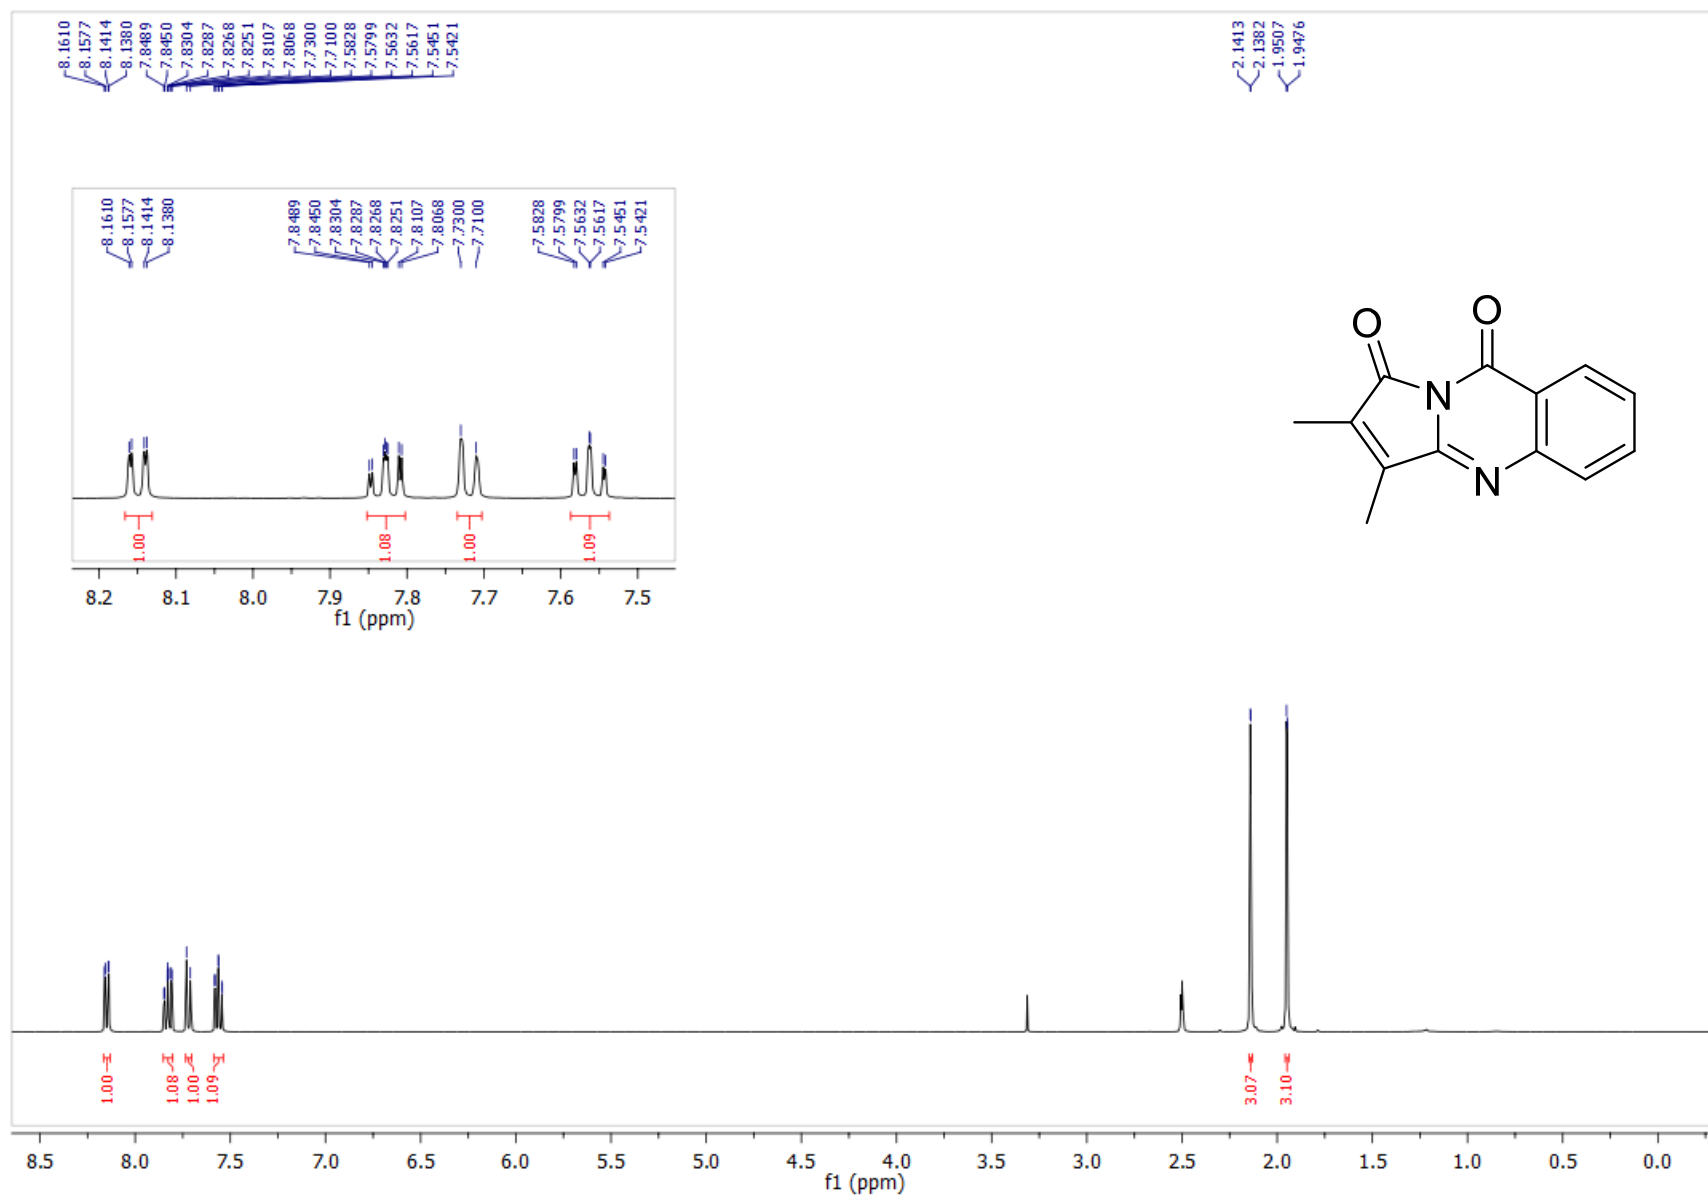

2,3-Dimethylpyrrolo[2,1-*b*]quinazoline-1,9-dione (1)  $^{13}\text{C}$  NMR (100 MHz,  $\text{DMSO-}d_6$ )

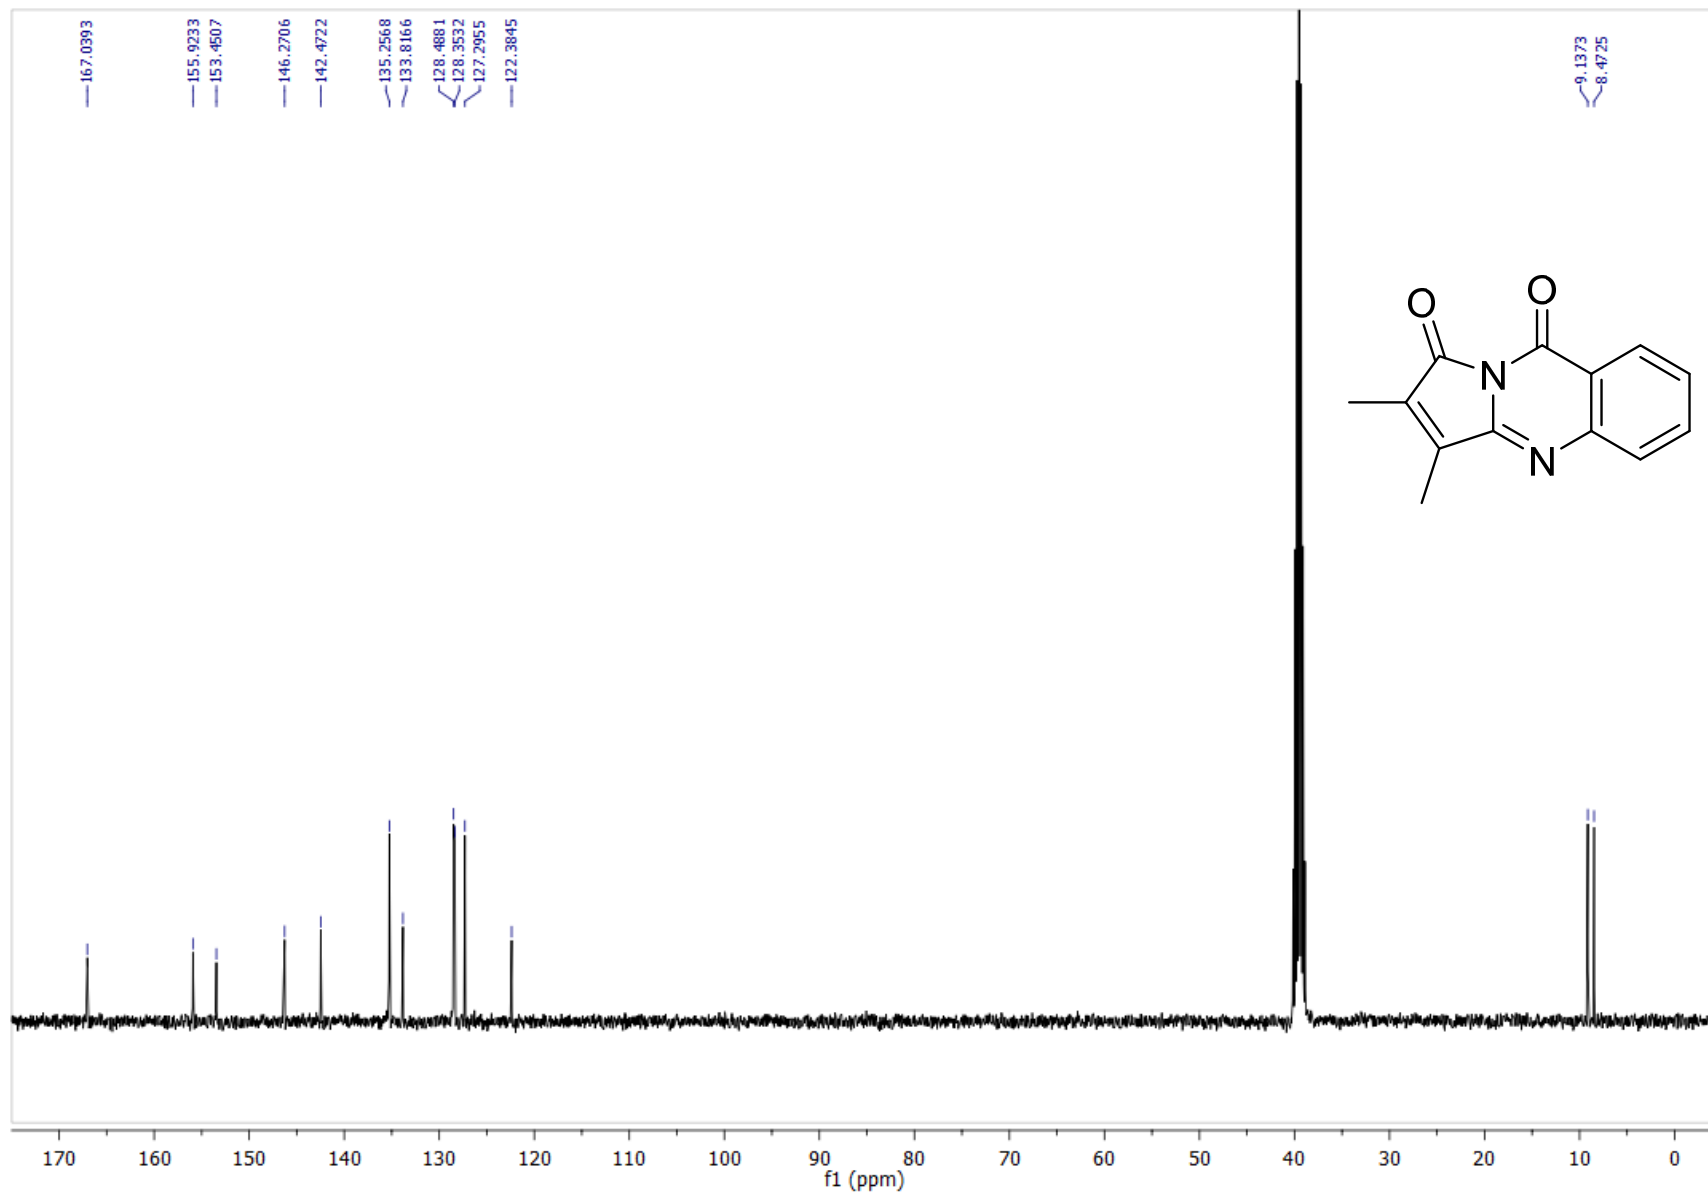

(±)-1-(2-(6-Methoxy-1*H*-indol-3-yl)ethyl)-3,4-dimethyl-1'*H*-spiro[pyrrole-2,2'-quinazoline]-4',5(1*H*,3'*H*)-dione (7) <sup>1</sup>H NMR (400 MHz, DMSO-*d*<sub>6</sub>)

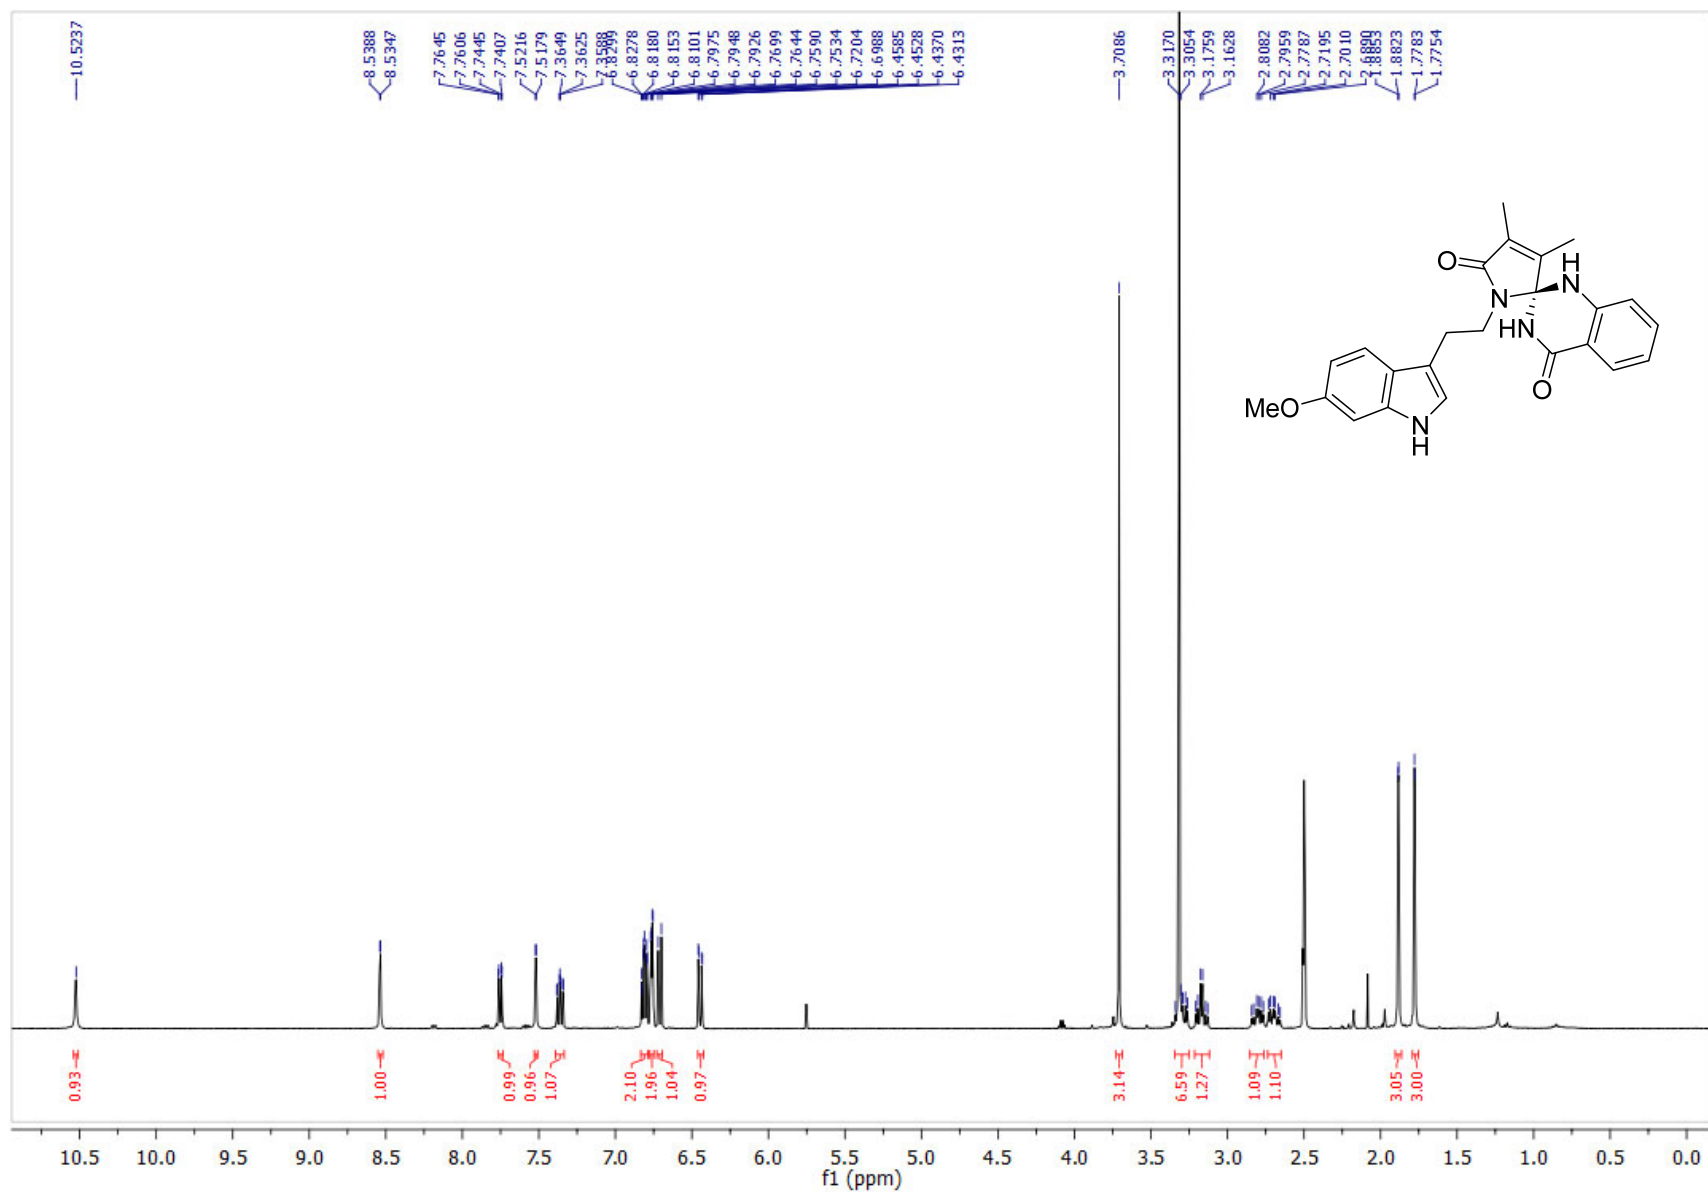

(±)-1-(2-(6-Methoxy-1*H*-indol-3-yl)ethyl)-3,4-dimethyl-1'*H*-spiro[pyrrole-2,2'-quinazoline]-4',5(1*H*,3'*H*)-dione (7) <sup>13</sup>C NMR (100 MHz, DMSO-*d*<sub>6</sub>)

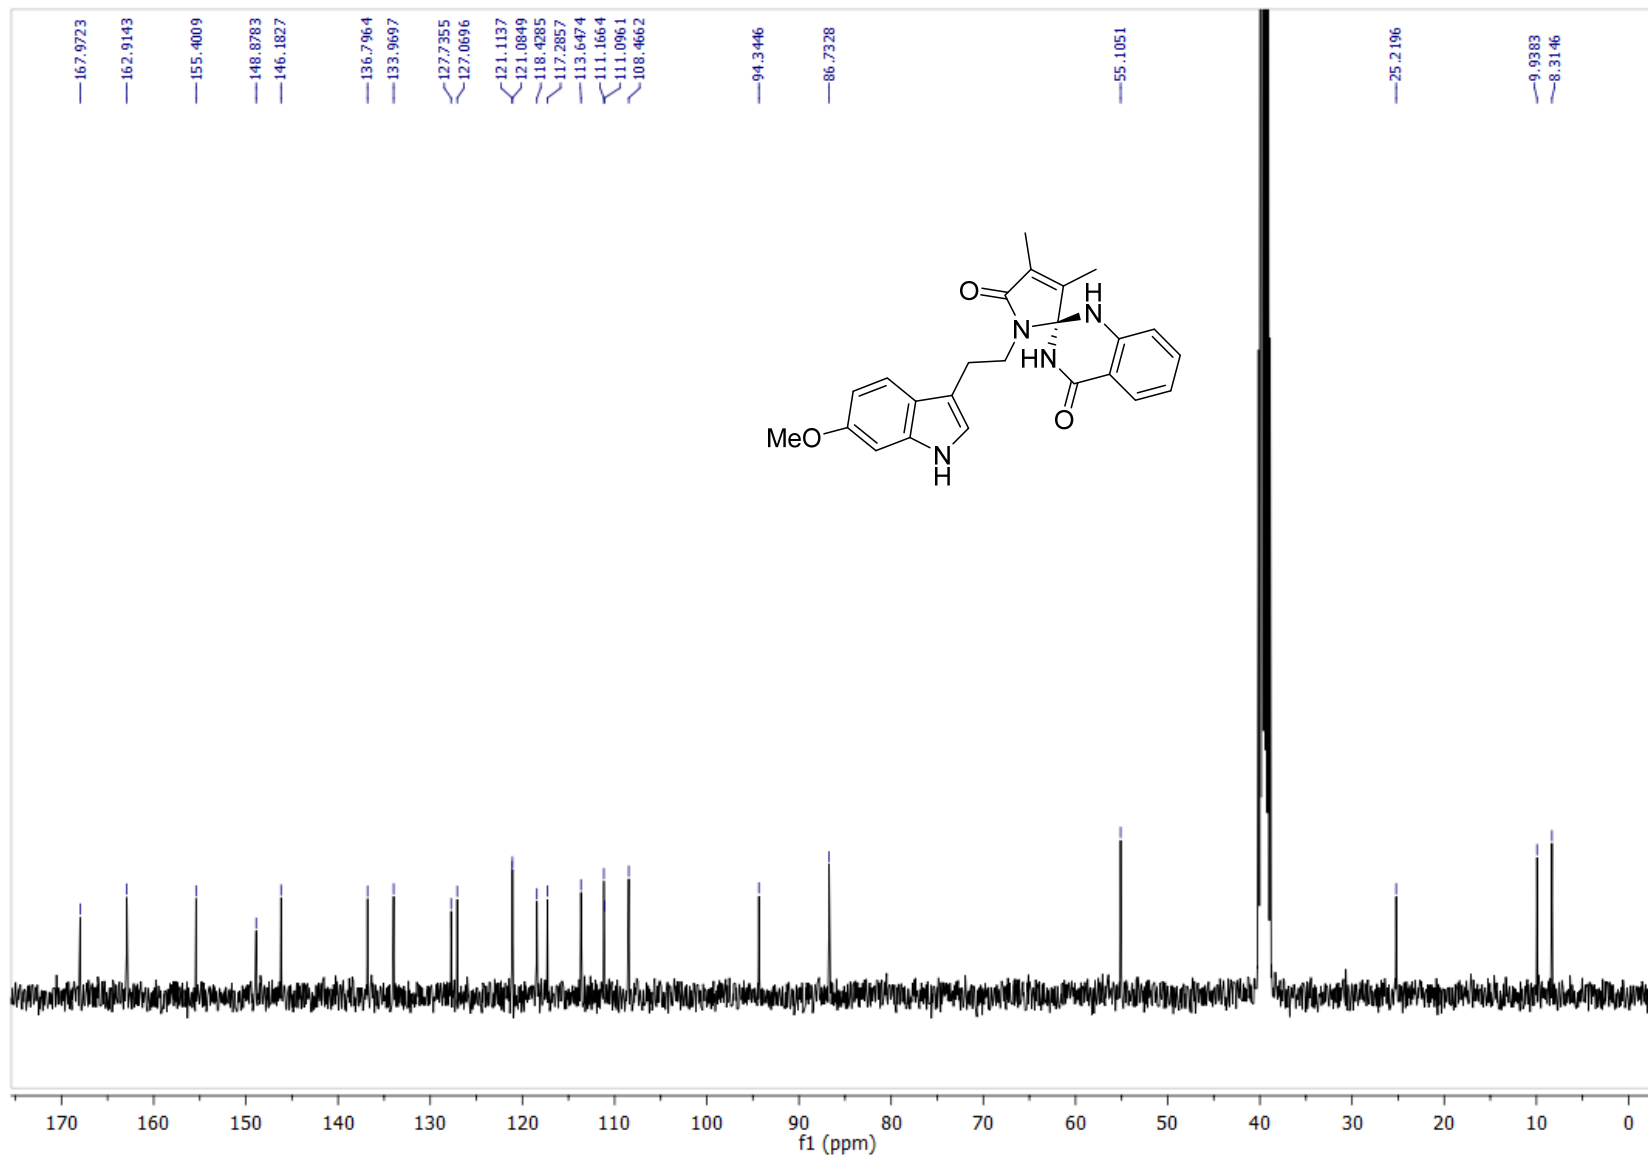

(±)-1-(2-(Indol-3-yl)ethyl)-3,4-dimethyl-1'*H*-spiro[pyrrole-2,2'-quinazoline]-4',5(1*H*,3'*H*)-dione (8) <sup>1</sup>H NMR (400 MHz, DMSO-*d*<sub>6</sub>)

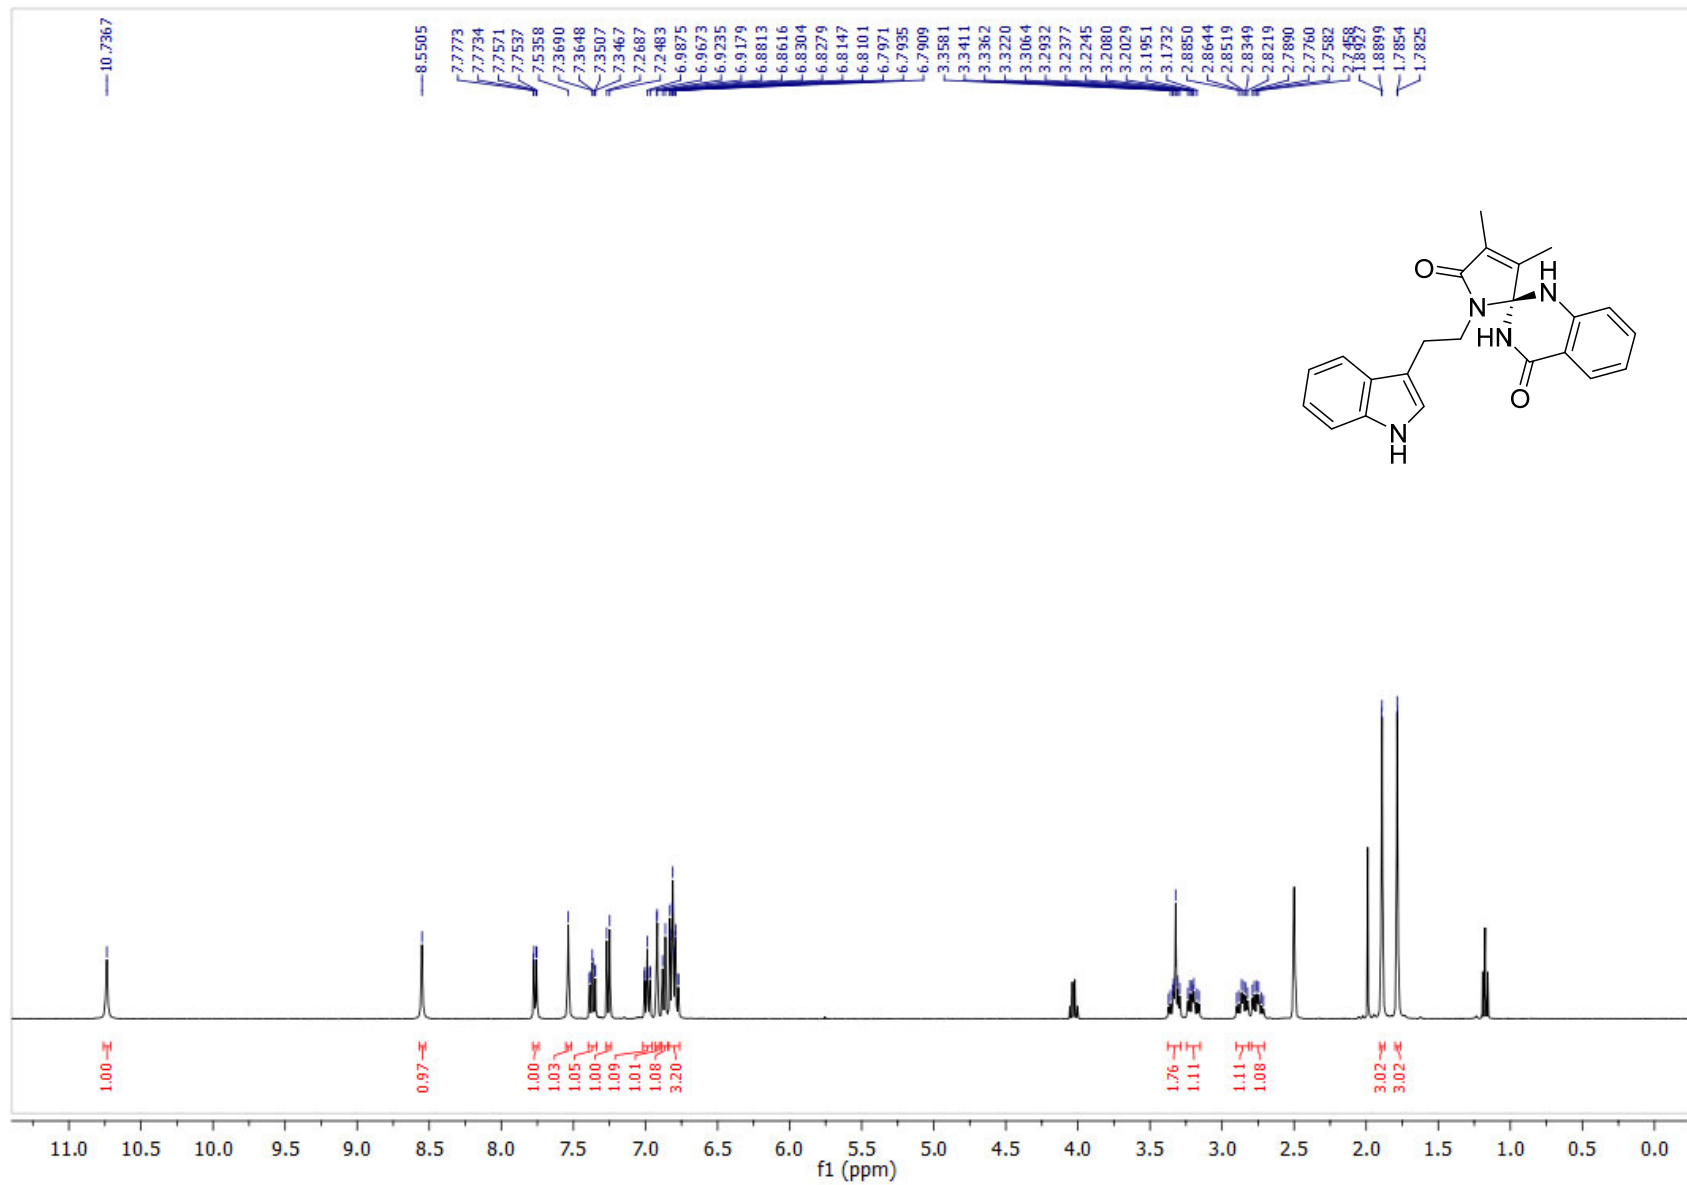

(±)-1-(2-(Indol-3-yl)ethyl)-3,4-dimethyl-1'*H*-spiro[pyrrole-2,2'-quinazoline]-4',5(1*H*,3'*H*)-dione (8) <sup>13</sup>C NMR (100 MHz, DMSO-*d*<sub>6</sub>)

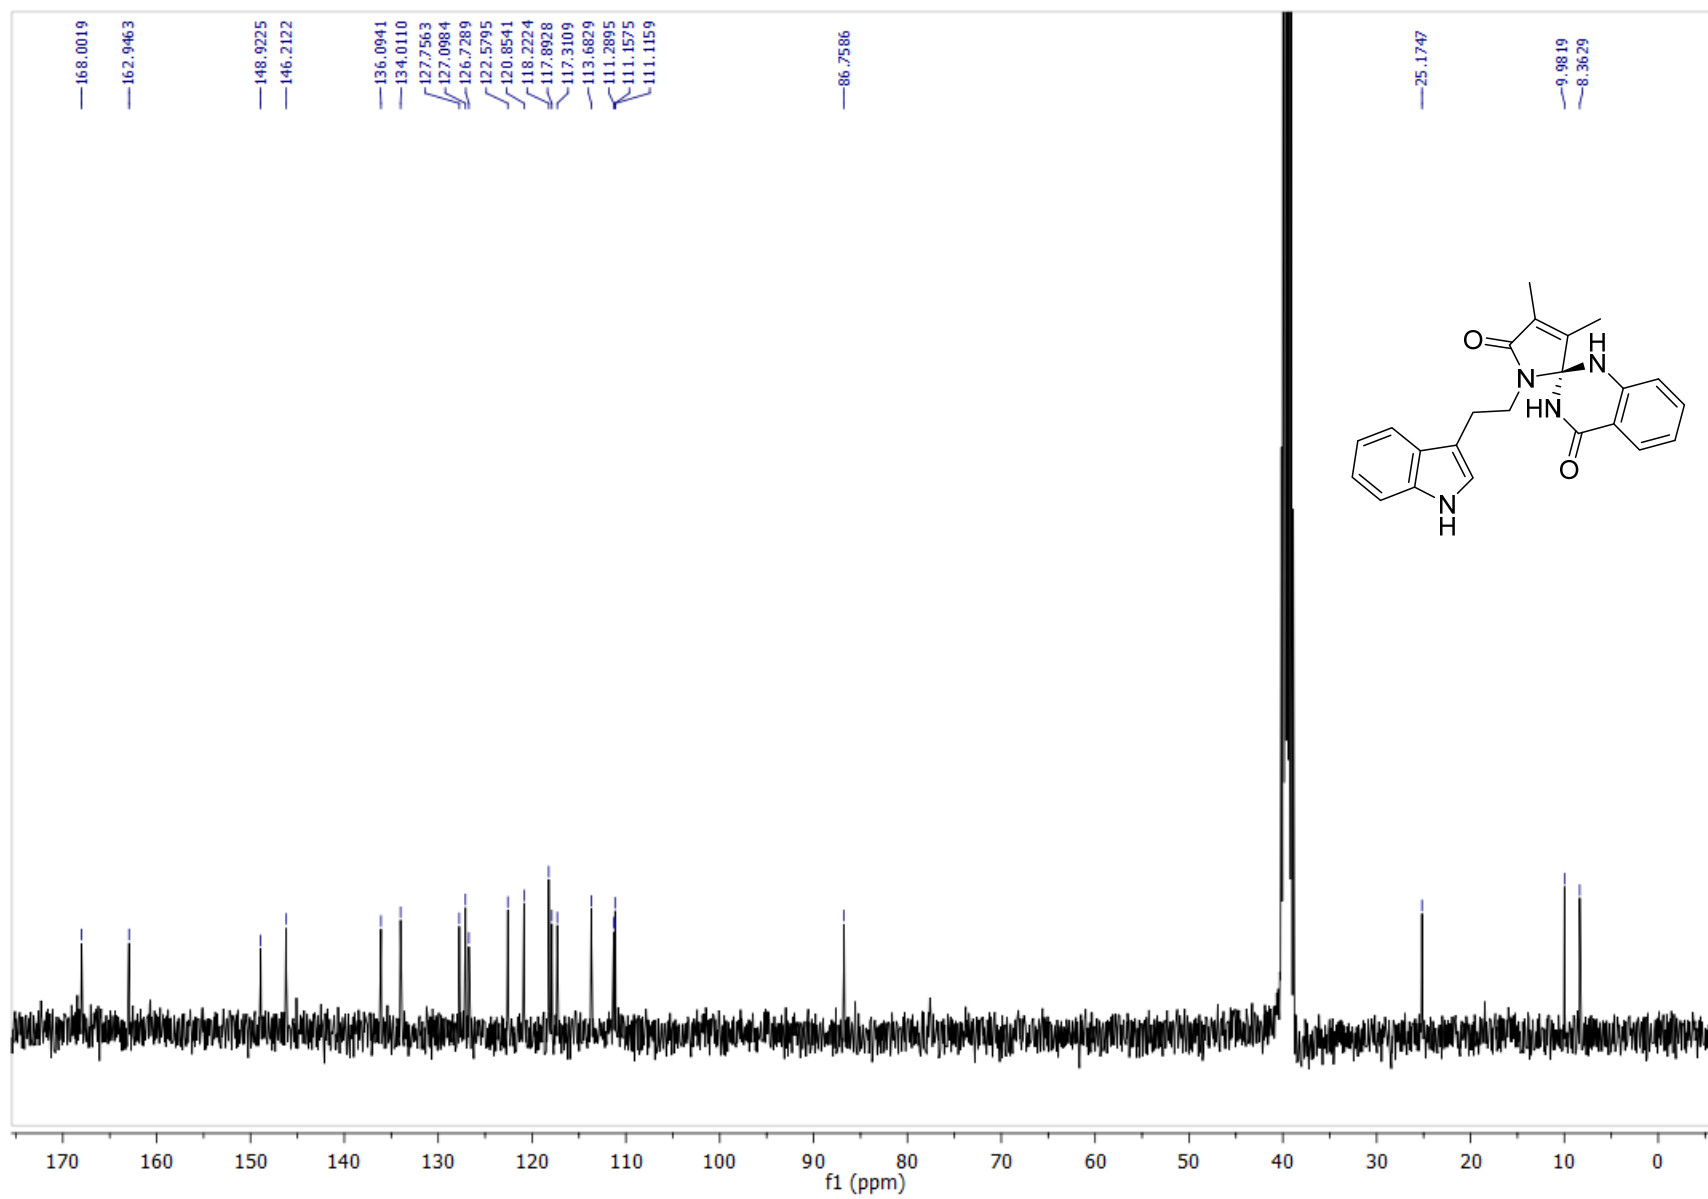



(±)-1-Hydroxy-2,3-dimethylpyrrolo[2,1-b]quinazolin-9(1H)-one (10) <sup>1</sup>H NMR (400 MHz, DMSO-*d*<sub>6</sub>)

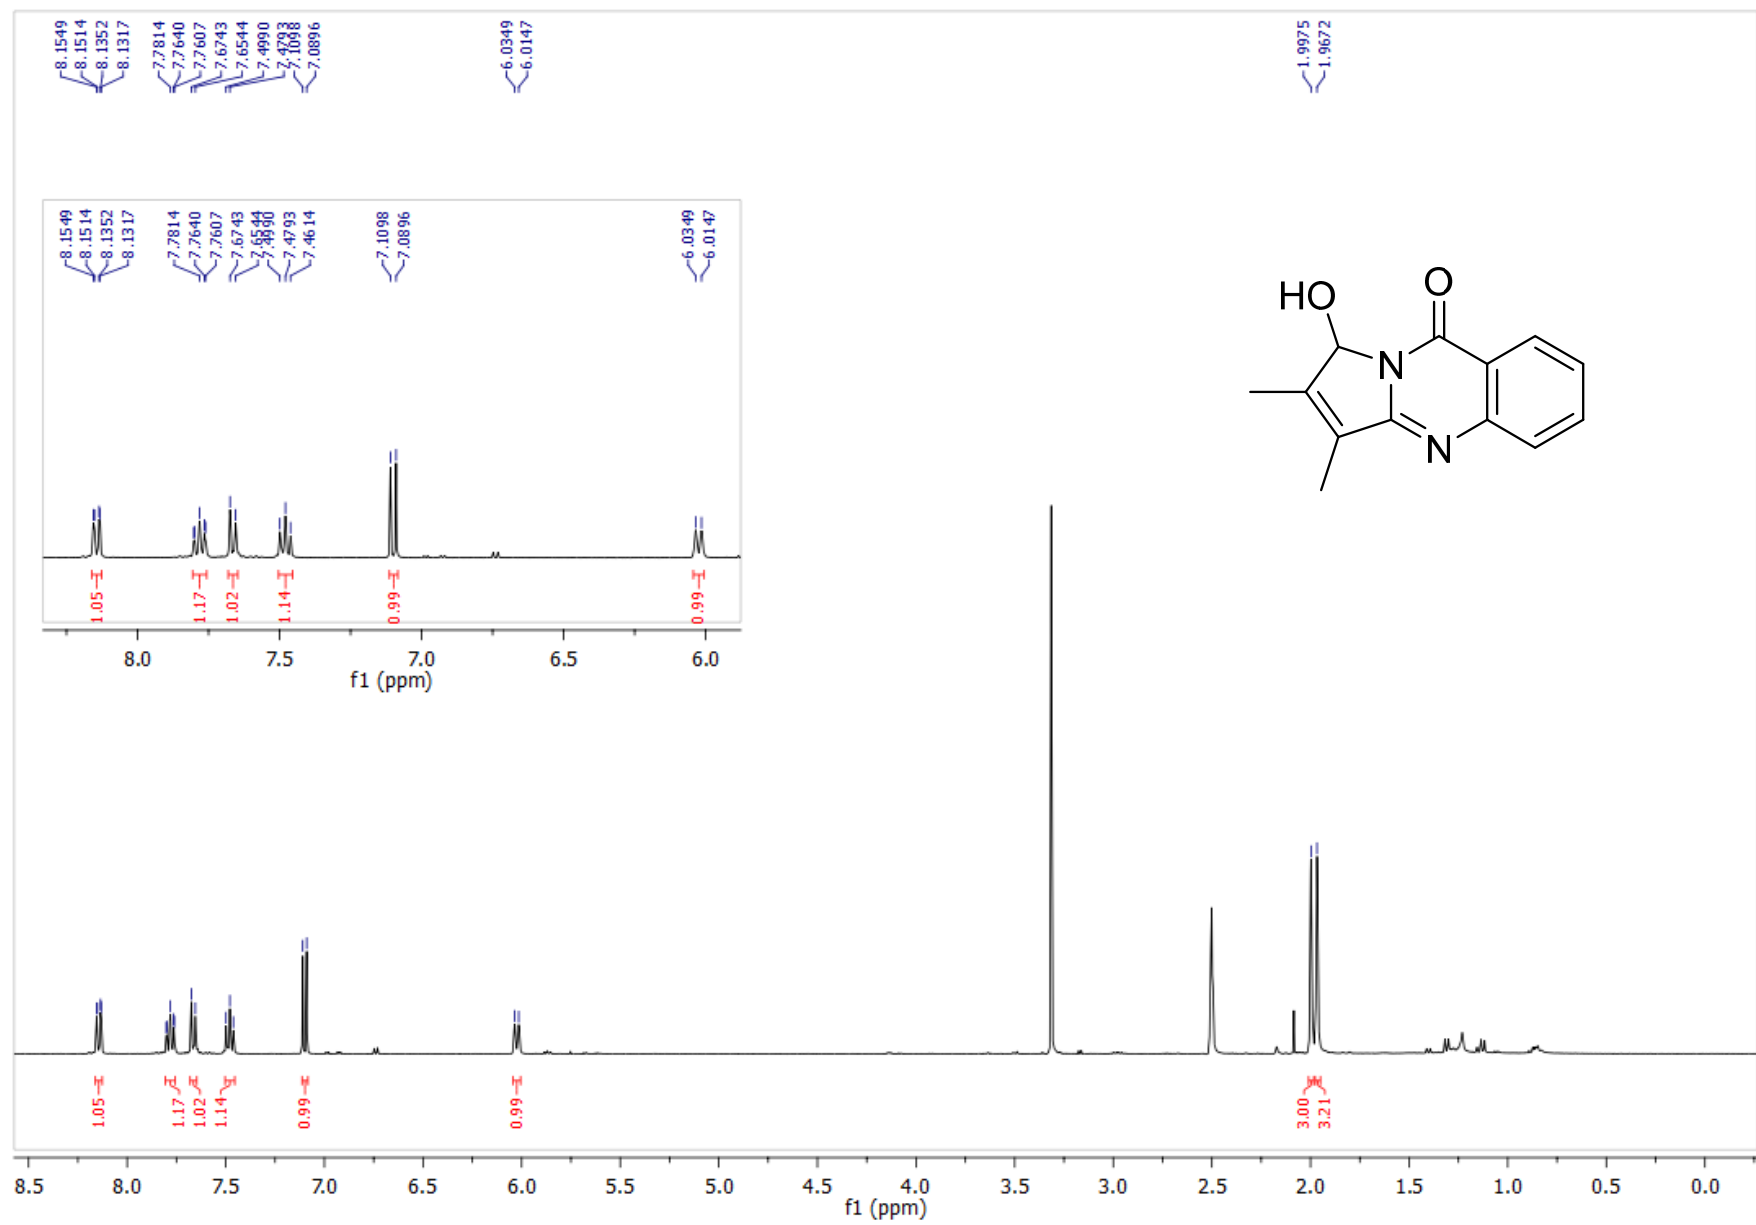

(±)-1-Hydroxy-2,3-dimethylpyrrolo[2,1-*b*]quinazolin-9(1*H*)-one (10) <sup>13</sup>C NMR (100 MHz, DMSO-*d*<sub>6</sub>)

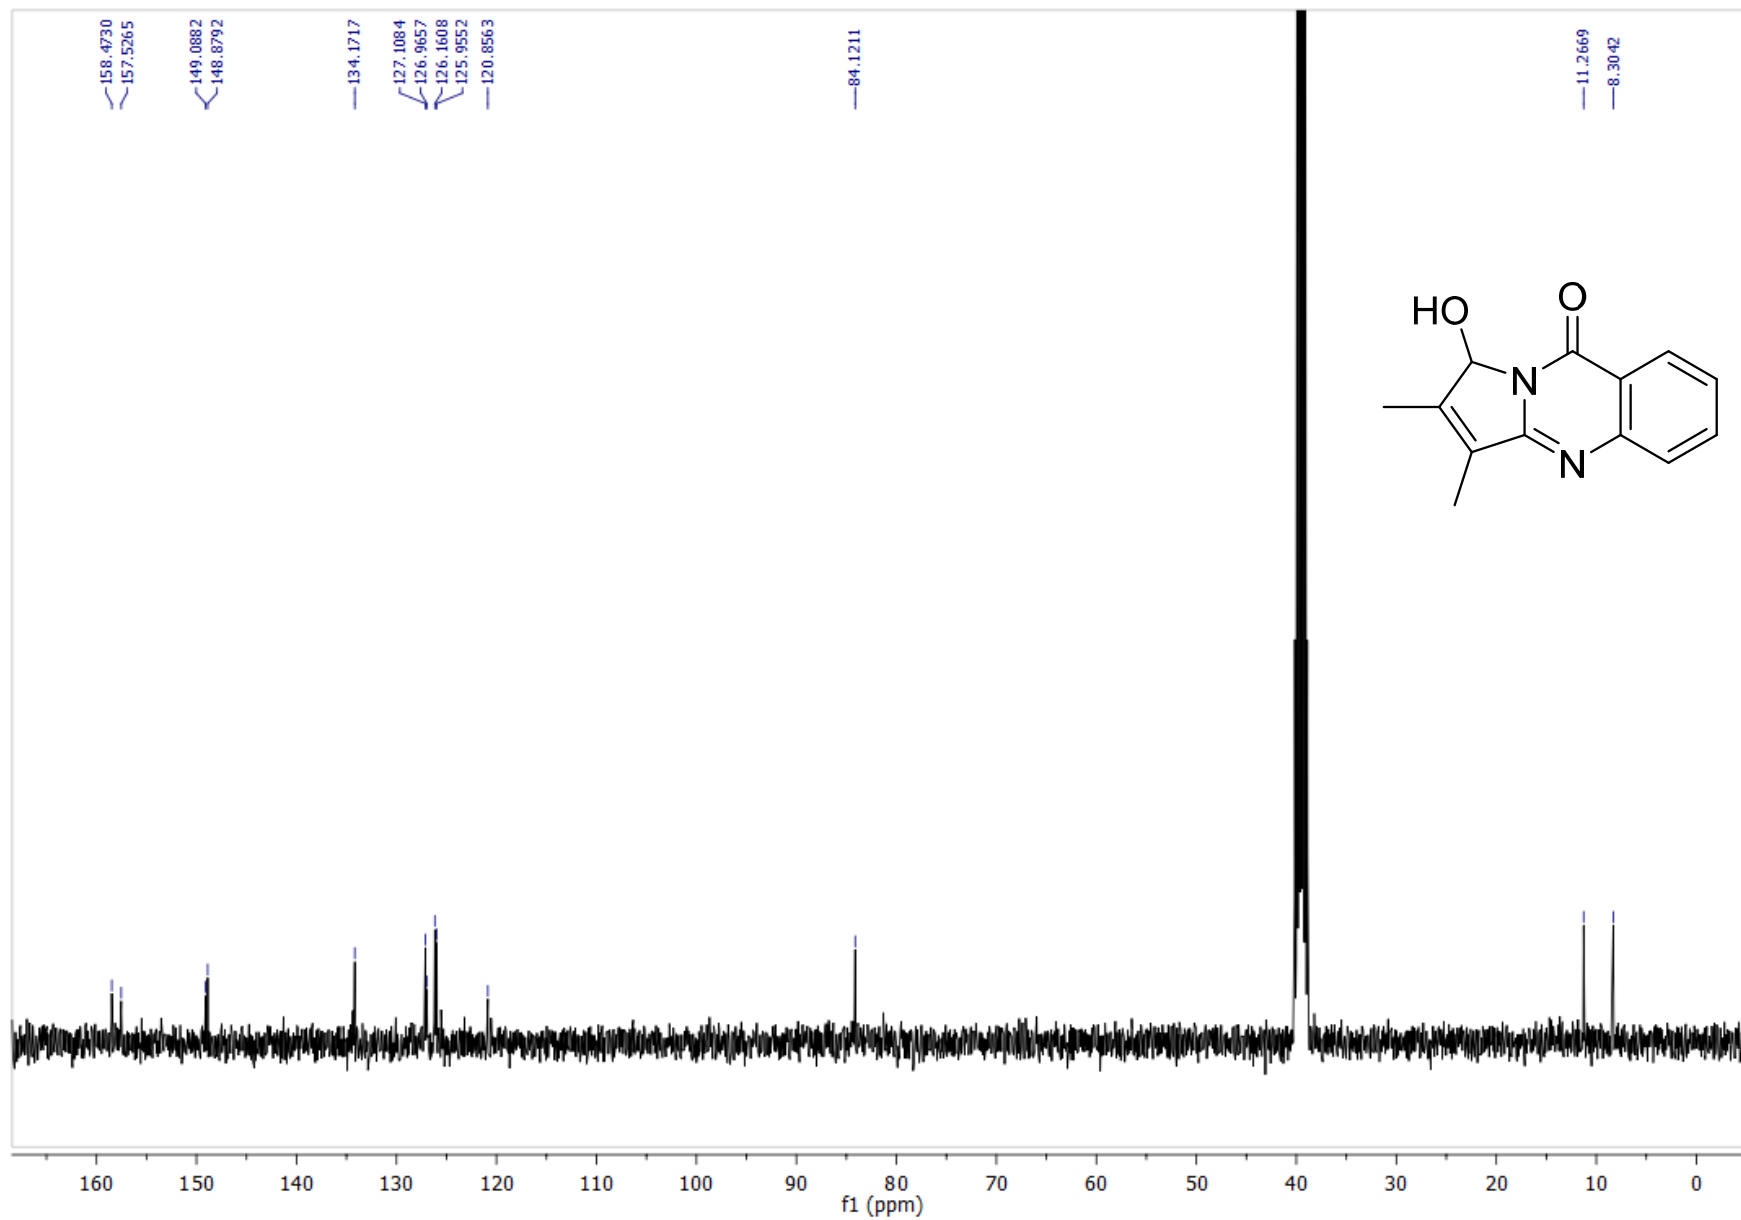

(±)-N-(2-(Indol-3-yl)ethyl)-2-methyl-3-(4-oxo-3,4-dihydroquinazolin-2-yl)butanamide (13A) <sup>1</sup>H NMR (400 MHz, DMSO-*d*<sub>6</sub>)

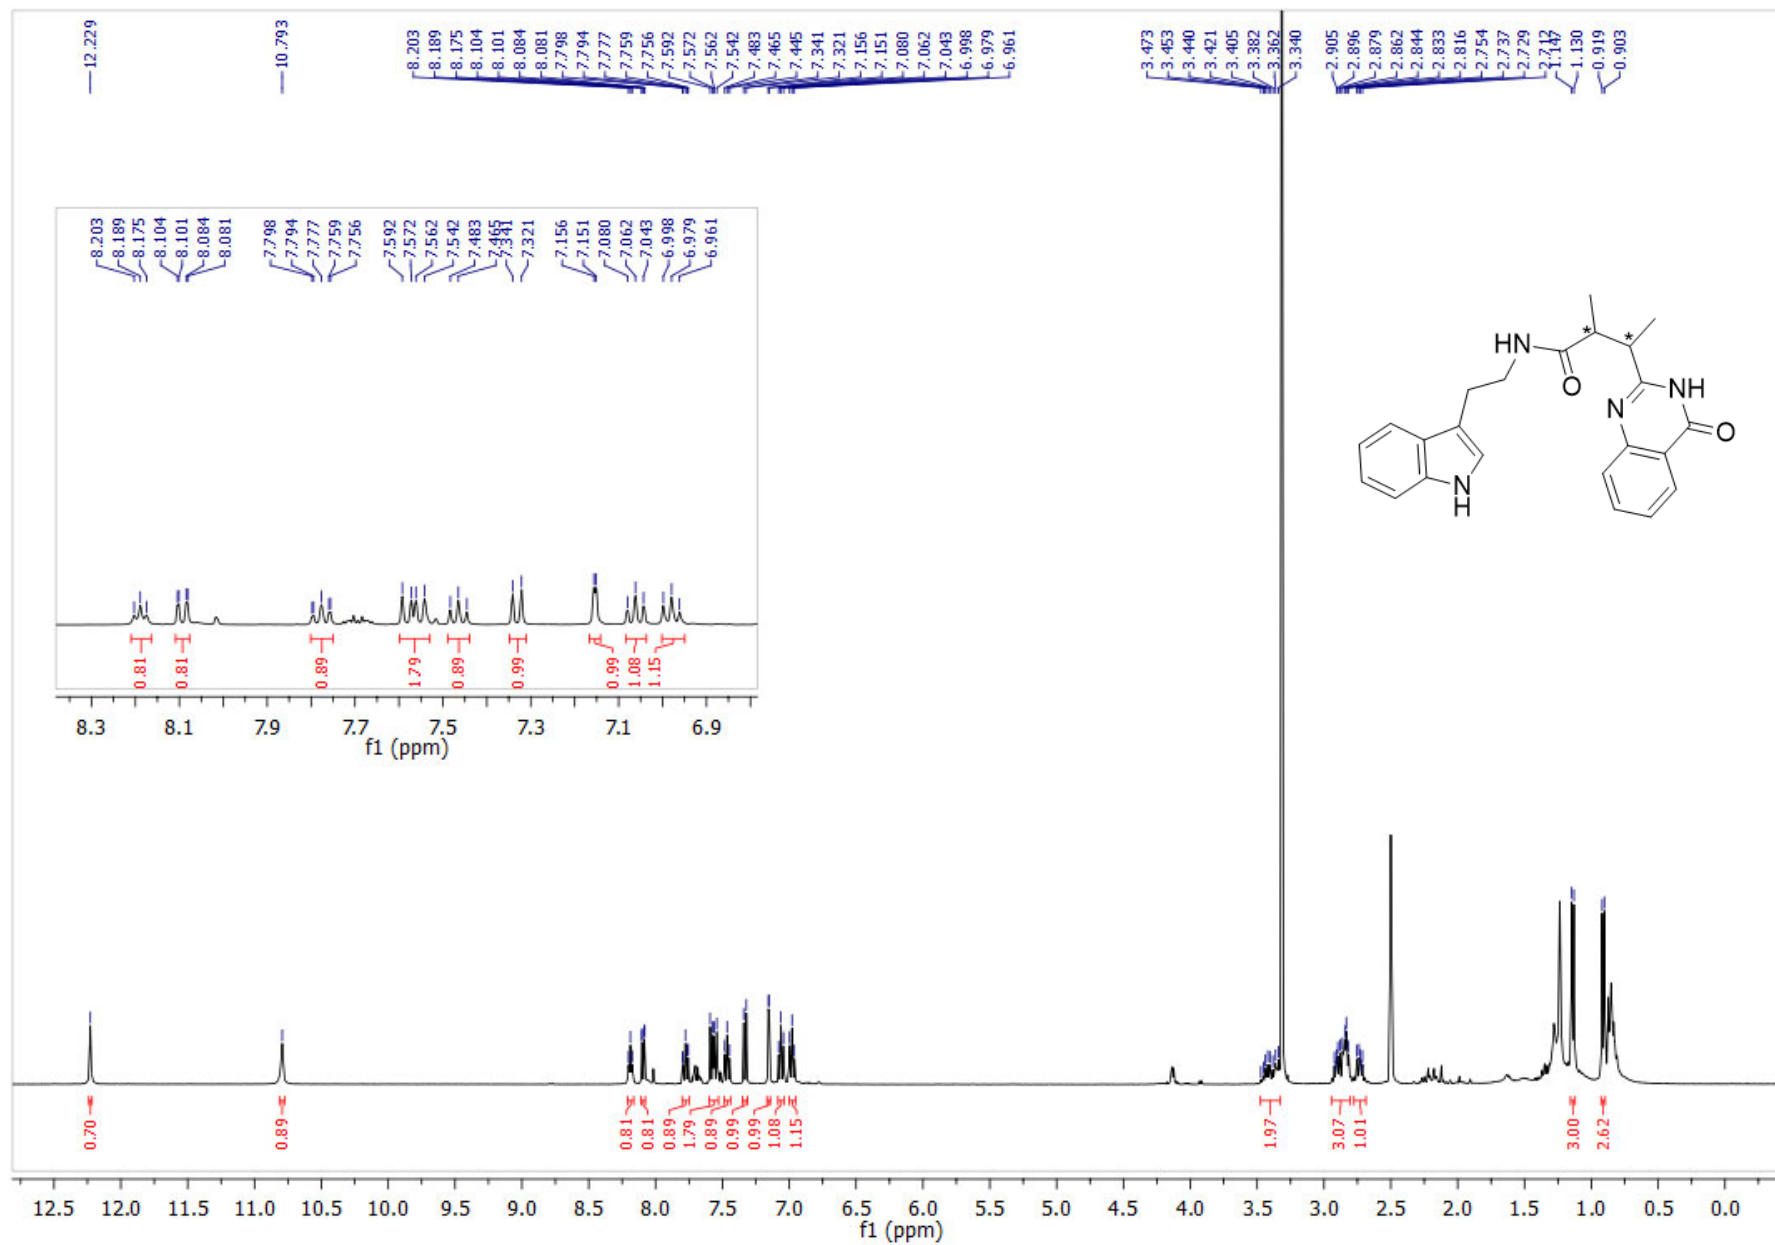

(±)-*N*-(2-(Indol-3-yl)ethyl)-2-methyl-3-(4-oxo-3,4-dihydroquinazolin-2-yl)butanamide (13A)  $^{13}\text{C}$  NMR (100 MHz,  $\text{DMSO-}d_6$ )

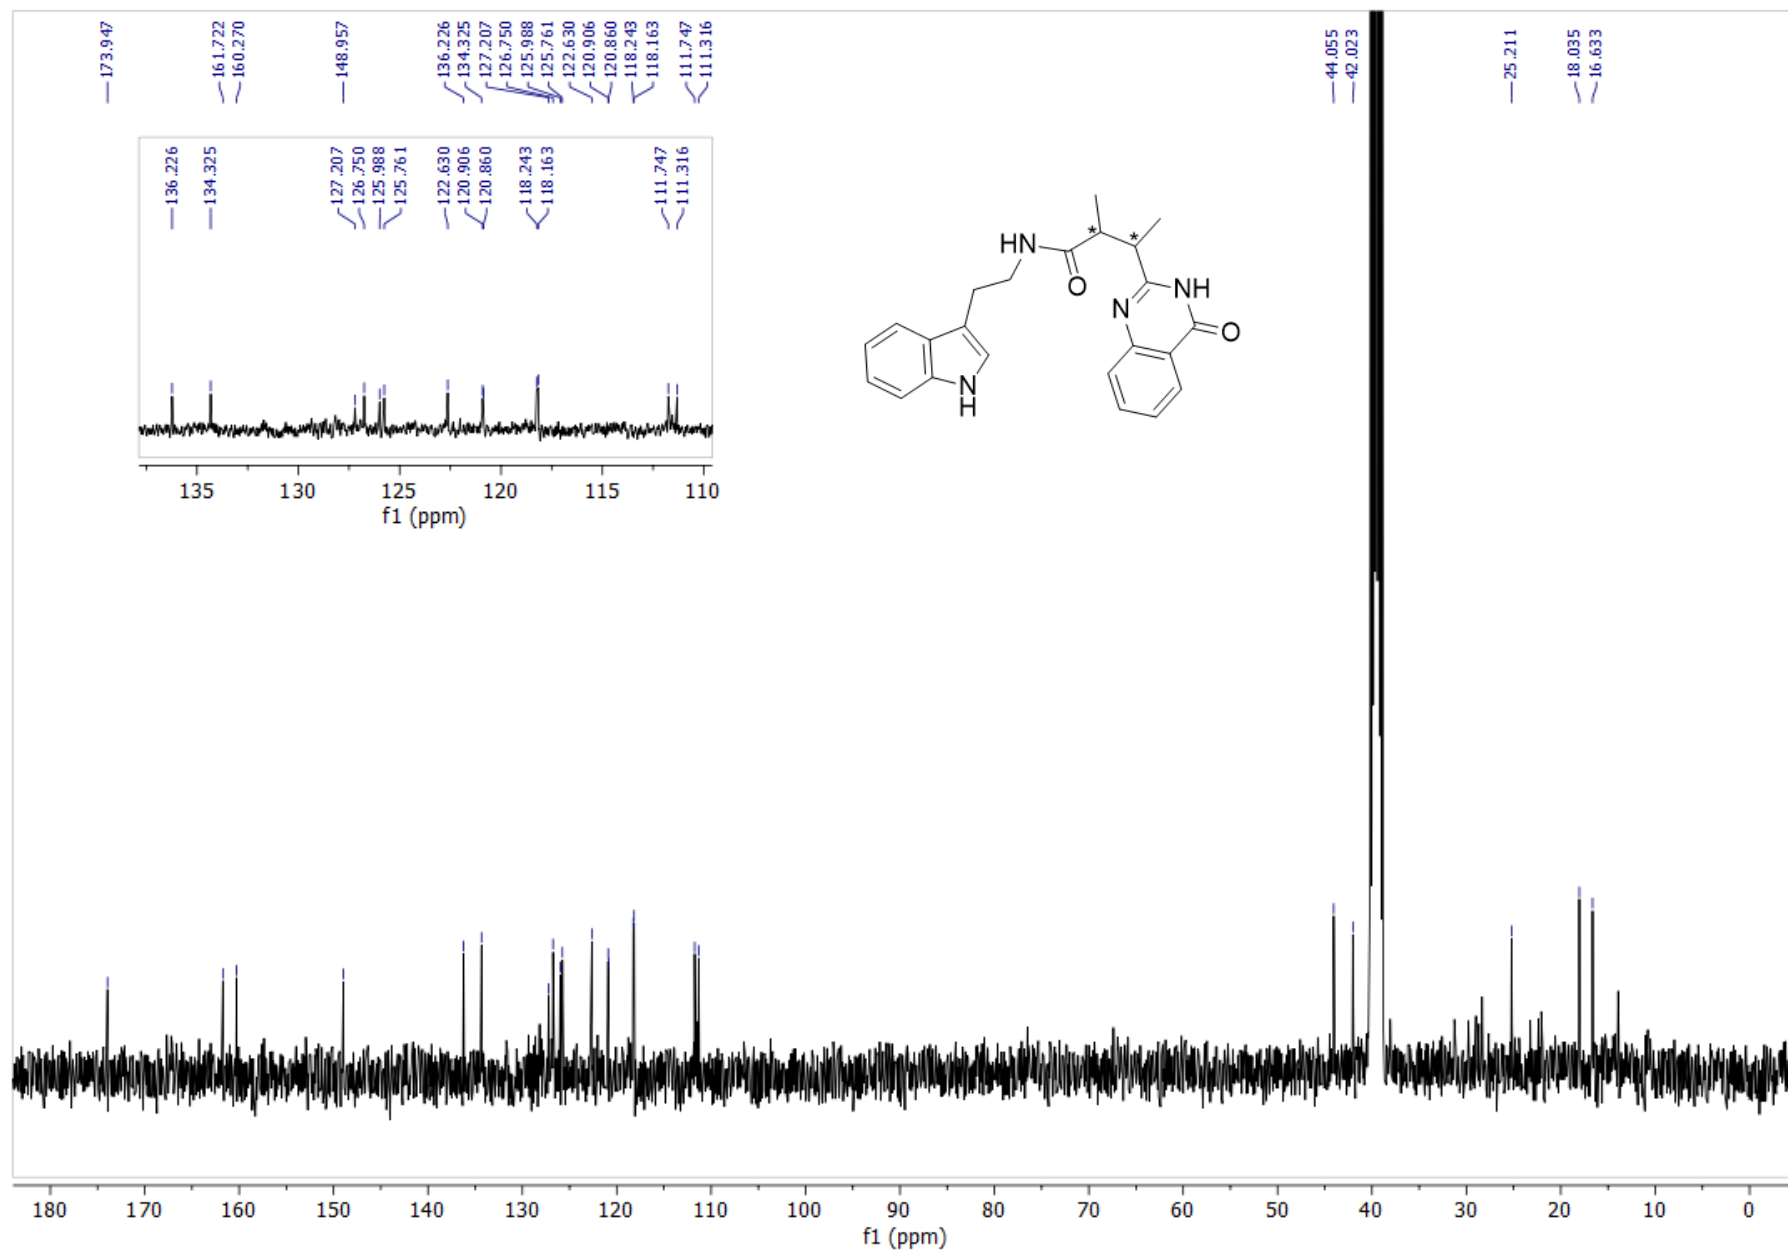

(±)-N-(2-(Indol-3-yl)ethyl)-2-methyl-3-(4-oxo-3,4-dihydroquinazolin-2-yl)butanamide (13B) <sup>1</sup>H NMR (400 MHz, DMSO-*d*<sub>6</sub>)

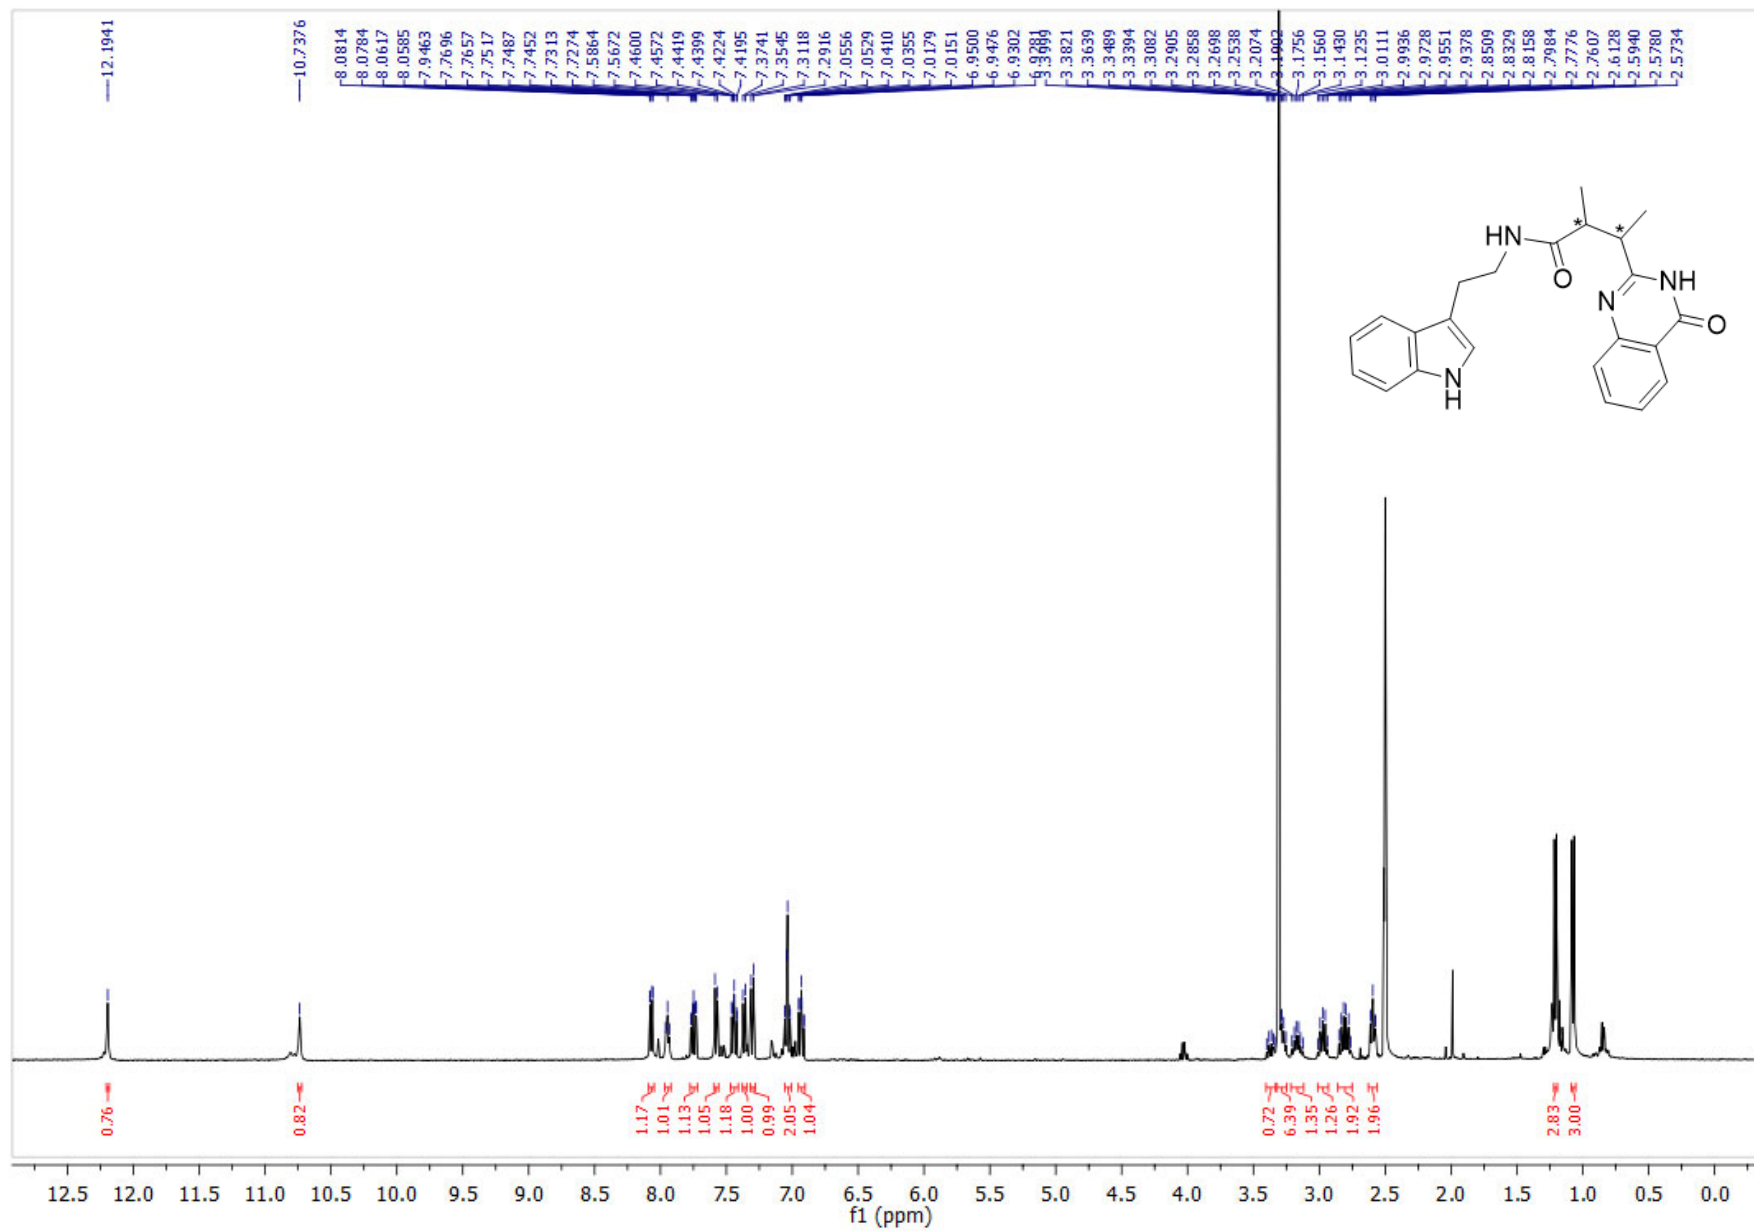

(±)-*N*-(2-(Indol-3-yl)ethyl)-2-methyl-3-(4-oxo-3,4-dihydroquinazolin-2-yl)butanamide (13B)  $^{13}\text{C}$  NMR (100 MHz,  $\text{DMSO-}d_6$ )

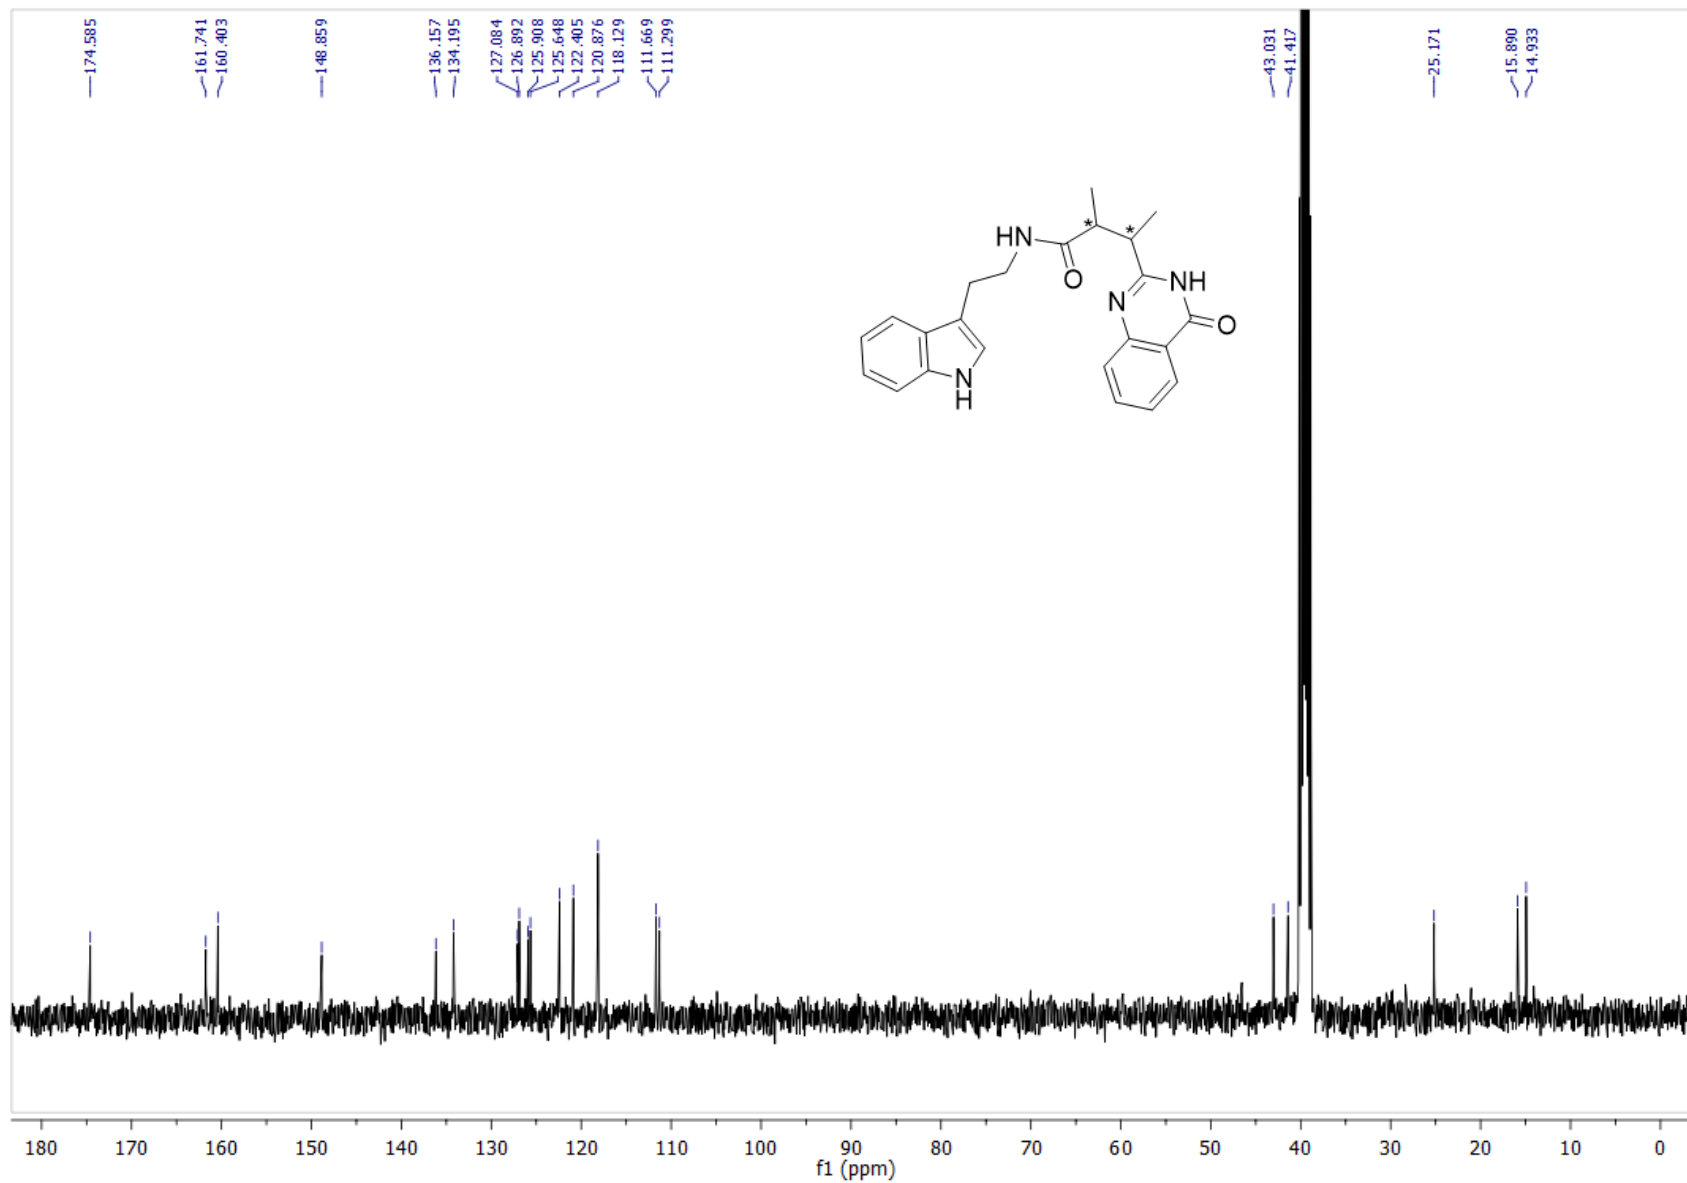

(±)-2-(2-(2,3,4,9-Tetrahydropyrido[3,4-b]indol-1-yl)ethyl)quinazolin-4(3H)-one (23) <sup>1</sup>H NMR (300 MHz, DMSO-*d*<sub>6</sub>)

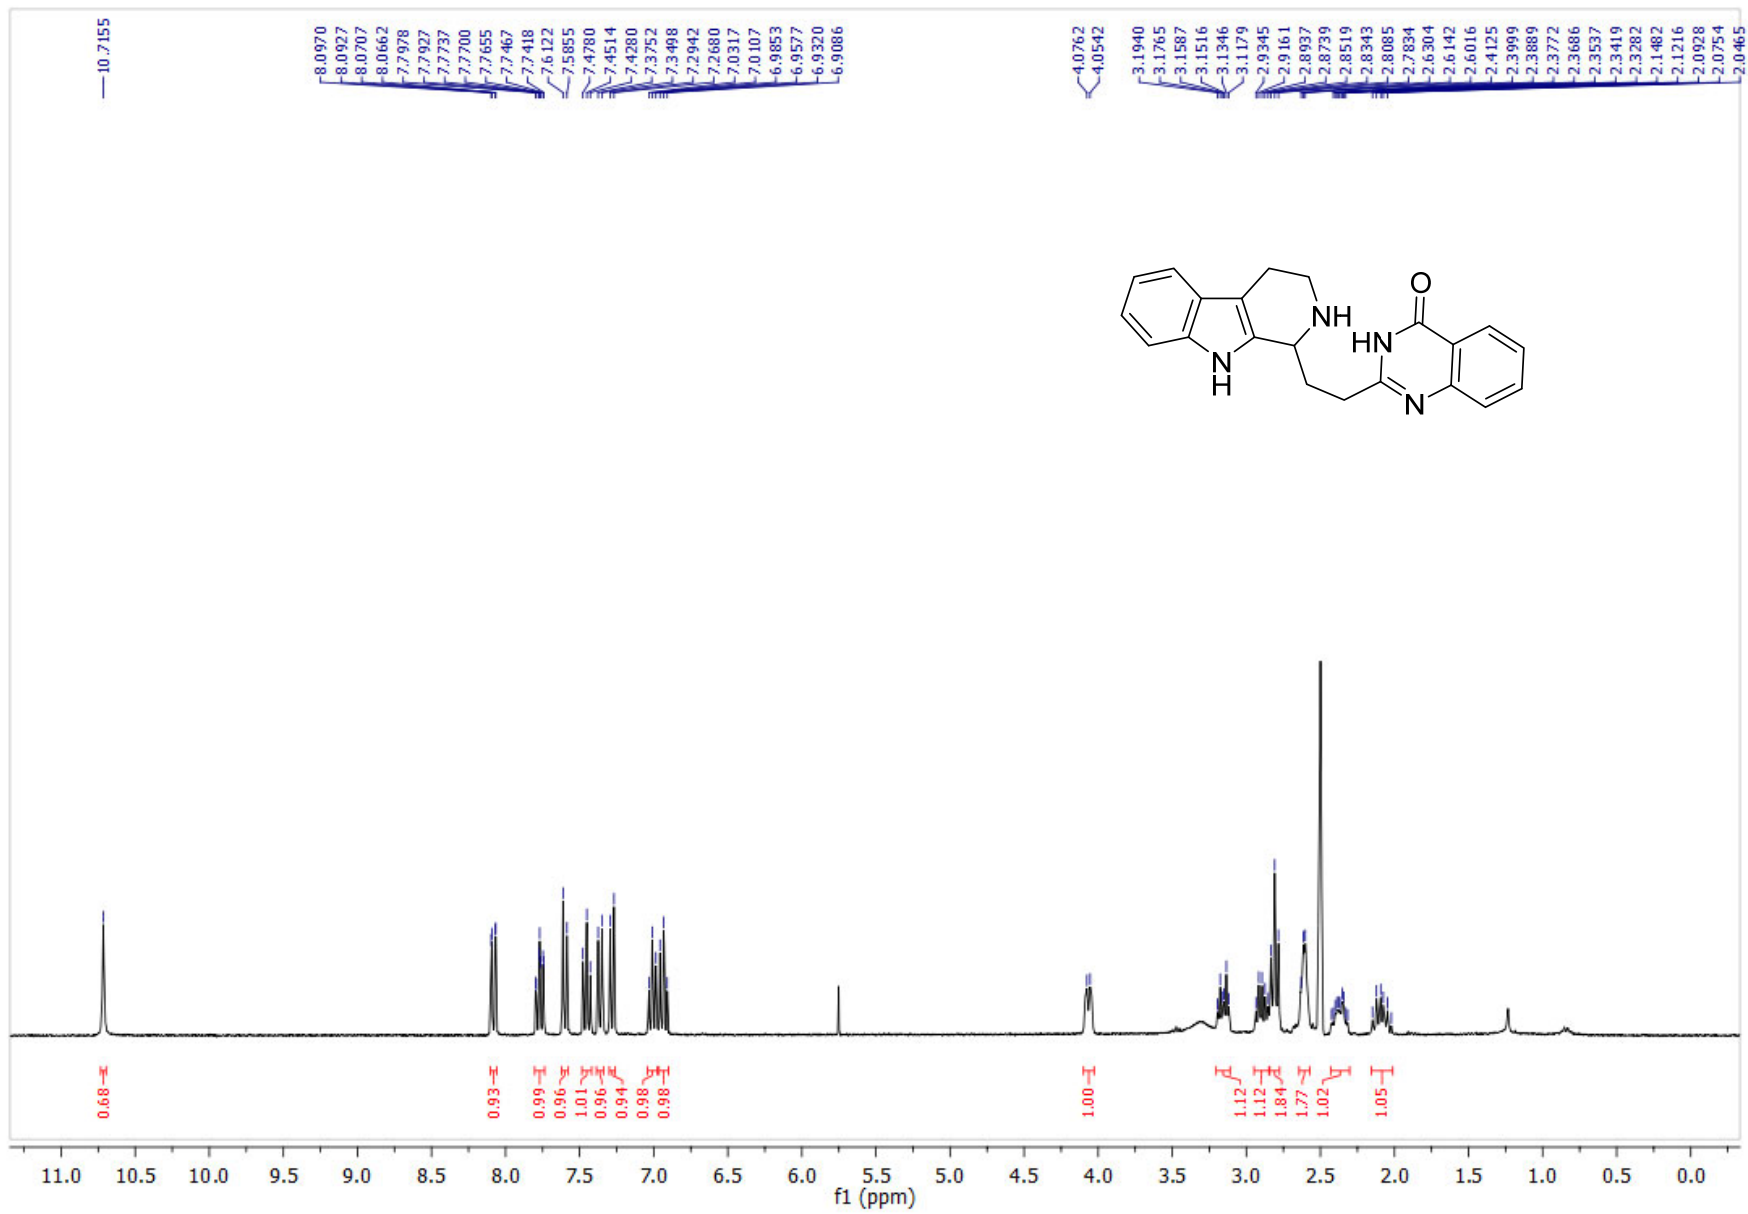

(±)-2-(2-(2,3,4,9-Tetrahydropyrido[3,4-b]indol-1-yl)ethyl)quinazolin-4(3H)-one (23) <sup>13</sup>C NMR (75 MHz, DMSO-*d*<sub>6</sub>)

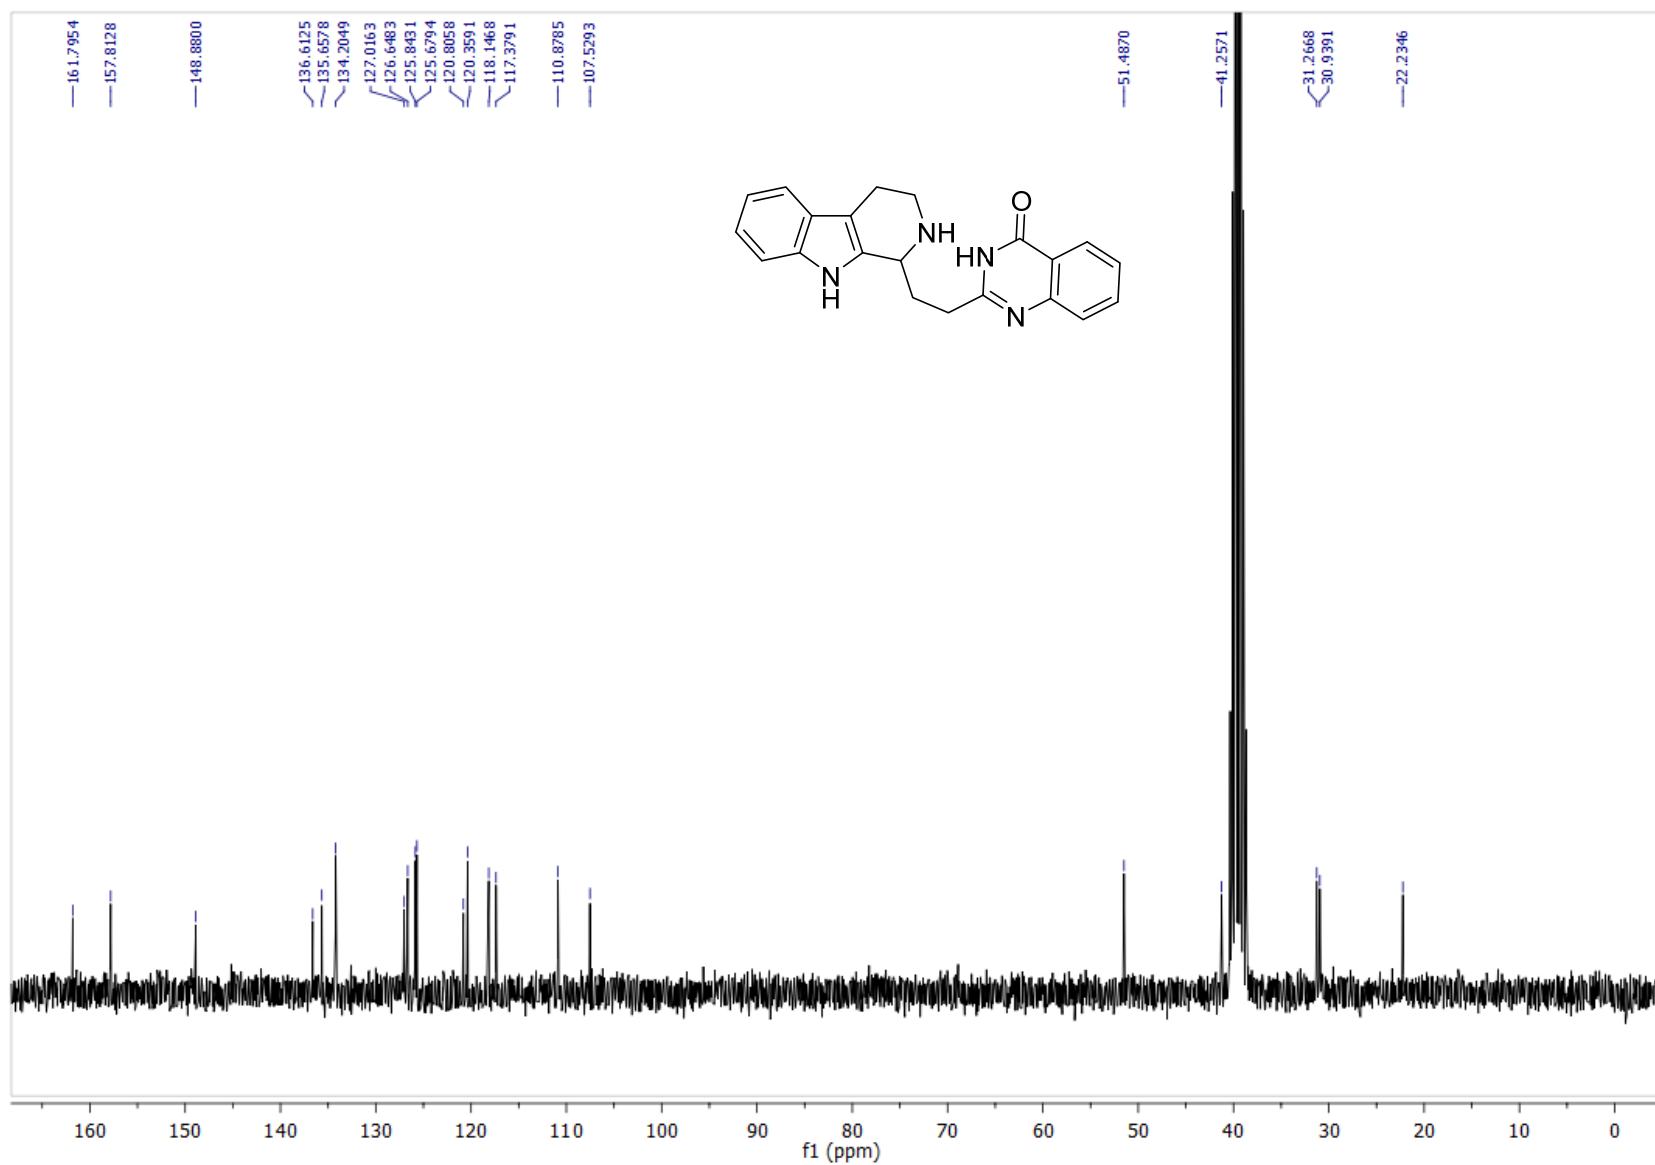



## XRD data table

|                                                       | (±)-7                                                            | 10                                                              | 23                                                               |
|-------------------------------------------------------|------------------------------------------------------------------|-----------------------------------------------------------------|------------------------------------------------------------------|
| <b>CCDC number</b>                                    | 1859965                                                          | 1859974                                                         | 2087701                                                          |
| <b>Empirical formula</b>                              | C <sub>23</sub> H <sub>22</sub> N <sub>4</sub> O <sub>2</sub>    | C <sub>13</sub> H <sub>12</sub> N <sub>2</sub> O <sub>2</sub>   | C <sub>21</sub> H <sub>20</sub> N <sub>4</sub> O                 |
| <b>Formula weight</b>                                 | 386.44                                                           | 228.25                                                          | 344.41                                                           |
| <b>Temperature/K</b>                                  | 109(2)                                                           | 99.9(5)                                                         | 100.0(1)                                                         |
| <b>Crystal system</b>                                 | monoclinic                                                       | monoclinic                                                      | monoclinic                                                       |
| <b>Space group</b>                                    | <i>P2<sub>1</sub>/n</i>                                          | <i>P2<sub>1</sub>/c</i>                                         | <i>P2<sub>1</sub>/n</i>                                          |
| <b>a/Å</b>                                            | 12.0831(2)                                                       | 15.7052(8)                                                      | 13.5402(3)                                                       |
| <b>b/Å</b>                                            | 9.0813(2)                                                        | 5.0360(2)                                                       | 7.8769(2)                                                        |
| <b>c/Å</b>                                            | 18.4230(3)                                                       | 13.3544(6)                                                      | 16.4206(4)                                                       |
| <b>α/°</b>                                            | 90                                                               | 90                                                              | 90                                                               |
| <b>β/°</b>                                            | 102.333(2)                                                       | 90.211(4)                                                       | 105.285(2)                                                       |
| <b>γ/°</b>                                            | 90                                                               | 90                                                              | 90                                                               |
| <b>Volume/Å<sup>3</sup></b>                           | 1974.91(6)                                                       | 1056.21(8)                                                      | 1689.38(7)                                                       |
| <b>Z</b>                                              | 4                                                                | 4                                                               | 4                                                                |
| <b>ρ<sub>calc</sub>/g/cm<sup>3</sup></b>              | 1.300                                                            | 1.435                                                           | 1.354                                                            |
| <b>μ/mm<sup>-1</sup></b>                              | 0.685                                                            | 0.807                                                           | 0.686                                                            |
| <b>F(000)</b>                                         | 816                                                              | 480.0                                                           | 728.0                                                            |
| <b>Crystal size/mm<sup>3</sup></b>                    | 0.32 × 0.14 × 0.1                                                | 0.16 × 0.14 × 0.1                                               | 0.05 × 0.05 × 0.01                                               |
| <b>Radiation</b>                                      | Cu Kα (λ = 1.54184)                                              | Cu Kα (λ = 1.54184)                                             | Cu Kα (λ = 1.54184)                                              |
| <b>2θ range for data collection/°</b>                 | 12.298 to 135.474                                                | 11.268 to 135.436                                               | 7.552 to 135.346                                                 |
| <b>Index ranges</b>                                   | -14 ≤ h ≤ 14, -10 ≤ k ≤ 9,<br>-22 ≤ l ≤ 21                       | -17 ≤ h ≤ 18, -6 ≤ k ≤ 6,<br>16 ≤ l ≤ 15                        | -16 ≤ h ≤ 15, -9 ≤ k ≤ 9,<br>-19 ≤ l ≤ 19                        |
| <b>Reflections collected</b>                          | 13539                                                            | 8761                                                            | 19105                                                            |
| <b>Independent reflections</b>                        | 3567 [R <sub>int</sub> = 0.0341,<br>R <sub>sigma</sub> = 0.0297] | 1894 [R <sub>int</sub> = 0.0308<br>R <sub>sigma</sub> = 0.0228] | 3053 [R <sub>int</sub> = 0.0602,<br>R <sub>sigma</sub> = 0.0344] |
| <b>Data/restraints/parameters</b>                     | 3567/0/272                                                       | 1894/0/157                                                      | 3053/0/243                                                       |
| <b>Goodness-of-fit on F<sup>2</sup></b>               | 1.067                                                            | 1.071                                                           | 1.056                                                            |
| <b>Final R indexes [I ≥ 2σ (I)]</b>                   | R <sub>1</sub> = 0.0366, wR <sub>2</sub> =<br>0.0941             | R <sub>1</sub> = 0.0544, wR <sub>2</sub> =<br>0.1524            | R <sub>1</sub> = 0.0447, wR <sub>2</sub> =<br>0.1213             |
| <b>Final R indexes [all data]</b>                     | R <sub>1</sub> = 0.0418, wR <sub>2</sub> =<br>0.0974             | R <sub>1</sub> = 0.0565, wR <sub>2</sub> =<br>0.1545            | R <sub>1</sub> = 0.0473, wR <sub>2</sub> =<br>0.1244             |
| <b>Largest diff. peak/hole / e<br/>Å<sup>-3</sup></b> | 0.18/-0.22                                                       | 0.31/-0.36                                                      | 0.23/-0.38                                                       |
